# Supplementary material for: Subduction plate interface shear stress associated with rapid subduction at deep slow earthquake depths: example from the Sanbagawa belt, Southwest Japan
Source: Copernicus journal article supplement (doi:10.5194/egusphere-2023-1442), 2023-07-10
Supplement: Supplementary file [file egusphere-2023-1442-AC2-supplement.pdf]

1 Reply to Referee Comment #2 (RC2)

2 Thank you for your feedback and suggested revisions. We appreciate your time  
3 and effort in reviewing our preprint.

4 We have considered the comments and taken action accordingly. We have  
5 made changes to address the majority of the issues raised by the reviewer.

6 **The manuscript carefully distinguishes various ductile deformation**  
7 **stages and then focuses on the main deformation stage. This main stage,**  
8 **however, represents early (and in one case late) exhumation. My concern**  
9 **is to what extent shear stress during exhumation can be applied to rapid**  
10 **subduction as the title suggests.**

11 Thank you for pointing this out. We have made the correction as follows:

12 The deformations we have studied were recorded during the early and late  
13 stages of the exhumation. However, the orogen-oblique stretching lineation of  
14 the Ds deformation is thought to reflect deformation closely related to rapid (24  
15 cm/yr: Engebretson et al., 1985; Ishii & Wallis, 2020) and oblique subduction of  
16 the subducted Izanagi Plate (e.g., Wallis, 1992; Wallis et al., 2009). For these  
17 reasons we consider that the deformation under consideration formed as the  
18 result of rapid subduction.

19 Moreover, if deformation of subducted sediments were driven by a  
20 combination of Couette flow (simple shear) driven by the subducting plate, and  
21 Poiseuille flow (channelized flow) driven by a pressure gradient produced by the  
22 buoyancy of the subducted sediment (e.g., Fig.4 in Platt et al., 2018), it is possible  
23 that exhumation of these rocks is associated with stable subduction. In this case,  
24 what we observed can be the area close to the overriding plate within the plate  
25 boundary domain.

26 In the paper, additions will be made to Section 2.3 "Deformation of Shirataki  
27 unit during the main metamorphic stage" according to the description above.

28 **The authors focus only on the quartz-rich regions. As outlined in the**  
29 **geological setting, the rocks are highly heterogeneous. The authors shortly**  
30 **address the fact that ultramafic bodies are minor and can be neglected.**

31 **Even if so, figure 3 clearly shows that the quartz shists are not the major**  
32 **lithology and that they are intercalated by pelitic and mafic shists. Such**  
33 **heterogeneities can cause stress concentration and result in larger scale**  
34 **stress gradients. Expanding the discussion in this direction as well as**  
35 **discussing relevant literature is needed.**

36 Thank you for pointing this out. We have made the correction.

37 Tulley et al. 2020 compared the flow laws for various rocks with the strength of  
38 hydrous metabasalt inferred from the geological structure and quartz  
39 recrystallized grain size. The results showed that mica-containing  
40 metasediments can be harder or softer than hydrous metabasalt or amphibolite,  
41 depending on temperature conditions. It was also shown that the strength of  
42 hydrous metabasalt is reduced by pressure solution creep and slip of  
43 phyllosilicates, which plays an important role in deformation along the  
44 subduction boundary. Therefore, the discussion of deformation other than  
45 quartz schist, pelitic, and psammitic schist is important for the discussion of rock  
46 deformation at subduction boundaries. In this study, no microstructural  
47 observations or stress estimates of quartz schist and basic schist in the chlorite  
48 zone, or pelitic and basic schist in the garnet and albite zones have been made.  
49 However, previous studies showed that the basic schist in the oligoclase biotite  
50 zone appears to be less affected by Ds deformation than other rock bodies (e.g.,  
51 Mori and Wallis., 2010), indicating that the associated strain is smaller. In  
52 addition, the quartz schist in the garnet zone has well-developed sheath folds  
53 (Wallis, 1990; Endo and Yokoyama, 2019), which are not observed in the  
54 surrounding lithologies suggesting that the strain in the quartz schist is  
55 particularly high. It is therefore possible that each rock body was deformed at a  
56 different strain rate and may have been deformed at the same stress. To  
57 investigate this, stress estimates should be made from the quartz domains for  
58 each schist, and the strength relationship between the other domains and the  
59 quartz domains in each schist should be investigated from structural and textural  
60 observations to constrain the deformation strength of each schist. If the flow  
61 laws of the constituent minerals are known, they may be combined to estimate  
62 the deformation of the entire rock body (Condit et al., 2022). It is also important  
63 to focus on lithological boundaries to confirm the presence or absence of  
64 structures that are attributable to strength contrasts, and this is a topic for future  
65 research.

66 Shear zones by antigorite serpentinite exist at the boundary between mantle  
67 wedge-derived serpentinite and pelitic schist (Kawahara et al., 2016). Although  
68 the area examined in our study is on the oceanic plate side of the subduction  
69 boundary region, it is possible that different minerals and different stress and  
70 strain conditions existed on the overriding plate side. Further research is needed  
71 on this as well.

72 In the paper, additions will be made to Section 4.1 “Stress recorded by quartz  
73 microstructure and in the subduction plate interface” according to the  
74 description above.

75 **Furthermore, heterogeneities also occur on a micro scale. The**  
76 **piezometers were applied to quartz-only domains. The authors argue that**  
77 **the presence of sheet silicates inhibits grain growth and might cause**  
78 **wrong estimates on differential stresses. The authors argue further that**  
79 **sheet silicates do not form a network. However, in figure 6a it seems the**  
80 **sheet silicates form a continuous layer. Again, such heterogeneities can**  
81 **cause stress gradients. It would be interesting to see how much variation**  
82 **in shear stress is obtained between quartz-only domains and more**  
83 **heterogenous domains. And if significant these uncertainties should be**  
84 **included into the discussion. Knowing that additional measurements need**  
85 **time and effort, I think the manuscript would already benefit if these**  
86 **points were addressed theoretically in the discussion.**

87 Thank you for your comments regarding the deformation of quartz-rich  
88 metasediments that also contain significant amounts of mica. We propose the  
89 following revisions.

90 ● Sample ASM2,3,4

91 The estimated stresses are almost identical to the stresses received by the rock  
92 body. However, the stresses received by the mica minerals may be even smaller,  
93 as the strength of the mica is assumed to be lower than the strength of the  
94 quartz dislocation creep under the temperature conditions treated in our study.

95 Detail of the above discussion is stated in lines 32–65 of the reply comment for  
96 RC1.

97 ●Sample ASM1

98 It is likely that the obtained stress is considered to be largely representative of  
99 the stresses undergone by the pelitic and psammitic schists of the chlorite zone.  
100 Such situations are only likely to occur when the deformation conditions are  
101 located near the boundary between the dislocation creep domain and the  
102 pressure solution creep domain. The change in the deformation mechanism  
103 between the vein/fringe and microlithon domains can be attributed to the  
104 difference in the degree of grain growth inhibition and activation of pressure  
105 solution creep due to the presence or absence of the quartz-mica boundary.

106 Detail of the above discussion is stated in lines 66–163 of the reply comment for  
107 RC1.

108 In the revised paper, the above text, figures, and tables (lines 32–163 of the reply  
109 comment for RC1) will be added to Sec 4.1 “Stress recorded by quartz  
110 microstructure and in the subduction plate interface”.

111 **Line 70: “Shear stress is equal to half the differential stress.” Only the**  
112 **maximum shear stress is equal to half the differential stress. Indeed, on**  
113 **line 37 the author write that shear stress is used for absolute maximum**  
114 **shear stress. I would suggest to strictly write maximum shear stress. The**  
115 **data presented are estimates on the maximum shear stress and for the**  
116 **discussion it is crucial to use accurate terms.**

117 Thank you for pointing this out. We have made the correction.

118 **Figure 1: the unit boundary of the smaller eclogite units is hardly**  
119 **distinguishable from small ultramafic bodies. I suggest using different**  
120 **colors for the boundary and the ultramafic bodies. (Actually, the color for**  
121 **ultramafic bodies in figure 3 is different)**

122 Thank you for pointing this out. Lithology information will be deleted, and a  
123 geological map of the same area will be produced and placed side by side.

124 **Figure 2c: Can you add PT values here? Or otherwise plot the ductile**  
125 **deformation stages in 2a.**

126 Thank you for your valuable comments. Deformation temperature pressure  
127 conditions vary according to metamorphic grade, making it difficult to fill in  
128 specific values. Therefore, the text has been amended as follows:

129 Line 136 "The main metamorphism that formed the Shirataki unit has four  
130 recognized ductile deformation phases, named Dr, Ds, Dt, and Du deformation,  
131 respectively (Wallis, 1990; Fig. 2b, 2c)."

132 ⇒"Each of the four metamorphic zones formed by the main metamorphic stage  
133 has a unique PT path (Fig. 2a). Moreover, all metamorphic zone has four  
134 recognized ductile deformation phases, named Dr (burial), Ds (exhumation near  
135 the peak metamorphic condition), Dt (exhumation after the peak metamorphic  
136 condition), and Du (Slightly burial after exhumation) deformation, respectively  
137 (Wallis, 1990; Fig. 2b, 2c). "

138 Line 151 "(c) Main metamorphism P–T–D path of the Shirataki unit (Aoya, 2001)  
139 modified by Kouketsu et al. (2021)."

140 ⇒ "(c) Deformation phases in the Shirataki unit (after Kouketsu et al., 2021). This  
141 P-T path corresponds to each metamorphic zone P–T path in the main  
142 metamorphism in Fig. 2a."

143 The Fig. 2c was modified to clarify the correspondence between Fig. 2a and Fig.  
144 2c.

145 **Figure 4: Can you also add pole figures?**

146 Thank you for pointing this out. We have made the correction.

147 **Table 3: The Cr+Ho data are a based on a corrected version of the Cross et**  
148 **al. piezometer after Holyoke et al. This is only mentioned in the discussion**  
149 **part. Please add some details also in the method section for better**  
150 **understanding of the present table.**

151 Thank you for pointing this out. The following text has been added to the method  
152 section.

153 "In this study, we also used the piezometer of Cross et al. (2017) with a correction  
154 for measured values by Griggs apparatus, which is proposed by Holyoke and

155 Kronenberg (2010). In this case, the stress value is 0.73 times the value obtained  
156 by piezometer of Cross et al. (2017).”

157

158 Once again, we sincerely appreciate the opportunity to address your comments  
159 and concerns. If you have any further comments or queries, please do not  
160 hesitate to contact us.

161 Yours sincerely

162 Authors.

163

164

165

166

167

168

169

170

171

172

173

174

175

176

177 **References**

- 178 Aoya, M.: P-T-D Path of Eclogite from the Sambagawa Belt Deduced from  
179 Combination of Petrological and Microstructural Analyses, *J. Petrol.*, 42 (7), 1225–  
180 1248, 2001.
- 181 Berman, R. G.: Internally-Consistent Thermodynamic Data for Minerals in the  
182 System Na<sub>2</sub>O-K<sub>2</sub>O-CaO-MgO-FeO-Fe<sub>2</sub>O<sub>3</sub>-Al<sub>2</sub>O<sub>3</sub>-SiO<sub>2</sub>-TiO<sub>2</sub>-H<sub>2</sub>O-CO<sub>2</sub>, *J. Petrol.*, 29 (2),  
183 445–522, <https://doi.org/10.1093/petrology/29.2.445>, 1998.
- 184 Burnham, C. W., Holloway, J. R., and Davis, N. F.: The thermodynamic  
185 properties of water to 1000°C and 10, 000 bars, *Geol. Soc. Amer. Spec.*  
186 *Paper*, pp.96, ISBN 13: 9780813721323, 1969.
- 187 Condit, C. B., French, M. E., Hayles, J. A., Yeung, L. Y., Chin, E. J., and Lee, C. A.:  
188 Rheology of Metasedimentary Rocks at the Base of the Subduction Seismogenic  
189 Zone, *Geochem. Geophys. Geosy.*, 23 (2), <https://doi.org/10.1029/2021GC010194>,  
190 2022.
- 191 Cross, A. J., Prior, D. J., Stipp, M., and Kidder, S.: The recrystallized grain size  
192 piezometer for quartz: An EBSD-based calibration, *Geophys. Res. Lett.*, 44 (13),  
193 6667–6674, doi:10.1002/2017GL073836, 2017.
- 194 Den Brok, S. W. J.: Effect of microcracking on pressure-solution strain rate: The  
195 Gratz grain-boundary model, *Geology*, 26 (10), 915–918,  
196 [https://doi.org/10.1130/0091-7613\(1998\)026<0915:EOMOPS>2.3.CO;2](https://doi.org/10.1130/0091-7613(1998)026<0915:EOMOPS>2.3.CO;2), 1998.
- 197 Dobe, R., Das, A., Mukherjee, R., and Gupta, S.: Evaluation of grain boundaries as  
198 percolation pathways in quartz-rich continental crust using Atomic Force  
199 Microscopy, *Sci. Rep.*, 11 (1), 1–10, <https://doi.org/10.1038/s41598-021-89250-z>,  
200 2021.
- 201 Endo, S. and Yokoyama, S.: *Geology of the Motoyama District. Quadrangle Series*  
202 *1:50,000*, *Geol. Soc. Japan.*, Tsukuba, 2019.
- 203 Engebretson D. C., Cox A., and Gordon R. G.: Relative Motions Between Oceanic  
204 and Continental Plates in the Pacific Basin, *Geol. Soc. Am.*, doi:10.1130/SPE206-  
205 p1, 1985.

206 Farver, J. and Yund, R.: Silicon diffusion in a natural quartz aggregate: constraints  
207 on solution-transfer diffusion creep, *Tectonophysics*, 325 (3–4), 193–205,  
208 [https://doi.org/10.1016/S0040-1951\(00\)00121-9](https://doi.org/10.1016/S0040-1951(00)00121-9), 2000.

209 Fournier, R. O. and Potter II, R. W.: An equation correlating the solubility of quartz  
210 in water from 25° to 900°C at pressures up to 10,000 bars, *Geochim. Cosmochim.*  
211 *Ac.*, 46 (10), 1969–1973, [https://doi.org/10.1016/0016-7037\(82\)90135-1](https://doi.org/10.1016/0016-7037(82)90135-1), 1982.

212 Handy, M. R.: Flow laws for rocks containing two non-linear viscous phases: A  
213 phenomenological approach, *J. Struct. Geol.*, 16 (3), 287–301,  
214 [https://doi.org/10.1016/0191-8141\(94\)90035-3](https://doi.org/10.1016/0191-8141(94)90035-3), 1994.

215 Hickman, S. H. and Evans, B.: Kinetics of pressure solution at halite-silica  
216 interfaces and intergranular clay films, *J. Geophys. Res-Sol. Ea.*, 100 (87), 13113–  
217 13132, <https://doi.org/10.1029/95JB00911>, 1995.

218 Holland, T. J. B. and Powell, R.: An internally consistent thermodynamic data set  
219 for phases of petrological interest, *J. Metamorph. Geol.*, 16 (3), 309–343,  
220 <https://doi.org/10.1111/j.1525-1314.1998.00140.x>, 2004.

221 Holyoke, C. W. and Kronenberg, A. K.: Accurate differential stress measurement  
222 using the molten salt cell and solid salt assemblies in the Griggs apparatus with  
223 applications to strength, piezometers and rheology, *Tectonophysics*, 494 (1–2),  
224 17–31, doi:10.1016/j.tecto.2010.08.001, 2010.

225 Hunter N. J. R., Hasalová, P., Weinberg, R. F., and Wilson, C. J. L.: Fabric controls  
226 on strain accommodation in naturally deformed mylonites: The influence of  
227 interconnected micaceous layers, *J. Struct. Geol.*, 83, 180–193,  
228 <https://doi.org/10.1016/j.jsg.2015.12.005>, 2016.

229 Ishii, K. and Wallis, Simon. R.: High- and low-stress subduction zones recognized  
230 in the rock record, *Earth. Planet. Sc. Lett.*, 531, doi:10.1016/j.epsl.2019.115935,  
231 2020.

232 Kawahara, H., Endo, S., Wallis, S. R., Nagaya, T., Mori, H., and Asahara, Y., Brucite  
233 as an important phase of the shallow mantle wedge: Evidence from the Shiraga  
234 unit of the Sanbagawa subduction zone, SW Japan, *Lithos*, 254–255, 53–66,  
235 <https://doi.org/10.1016/j.lithos.2016.02.022>, 2016.



236 Lusk, A. D. J., Platt, J. P., and Platt, J. A.: Natural and Experimental Constraints on  
237 a Flow Law for Dislocation-Dominated Creep in Wet Quartz, *J. Geophys. Res-Sol.*  
238 *Ea.*, 126 (5), <https://doi.org/10.1029/2020JB021302>, 2021.

239 Mariani, E., Brodie, K. H., and Rutter, E. H.: Experimental deformation of  
240 muscovite shear zones at high temperatures under hydrothermal conditions  
241 and the strength of phyllosilicate-bearing faults in nature, *J. Struct. Geol.*, 28 (9),  
242 1569–1587, doi:10.1016/j.jsg.2006.06.009, 2006.

243 Mori, H. and Wallis, R. S.: Large-scale folding in the Asemi-gawa region of the  
244 Sanbagawa Belt, southwest Japan, *Isl. Arc.*, 19 (2), 357–370,  
245 <https://doi.org/10.1111/j.1440-1738.2010.00713.x>, 2010.

246 Platt, J. P., Xia, H., and Schmidt, W. L.: Rheology and stress in subduction zones  
247 around the aseismic/seismic transition, *Prog. Earth Planet. Sci.*, 5 (24),  
248 <https://doi.org/10.1186/s40645-018-0183-8>, 2018.

249 Rutter, E., H.: A Discussion on natural strain and geological structure - The  
250 kinetics of rock deformation by pressure solution, *Philos. T. R. Soc. A.*, 283 (1312),  
251 203–219, <https://doi.org/10.1098/rsta.1976.0079>, 1976.

252 Schmidt, W. L. and Platt J. P.: Stress, microstructure, and deformation  
253 mechanisms during subduction underplating at the depth of tremor and slow  
254 slip, Franciscan Complex, northern California, *J. Struct. Geol.*, 154,  
255 <https://doi.org/10.1016/j.jsg.2021.104469>, 2022.

256 Tulley, C. J., Fagereng, A., and Ujiie, K.: Hydrous oceanic crust hosts megathrust  
257 creep at low shear stresses, *Sci. Adv.*, 6 (22), DOI: 10.1126/sciadv.aba1529, 2020.

258 Wallis, S. R.: The timing of folding and stretching in the Sambagawa belt: The  
259 Asemigawa region, central Shikoku, *J. Geol. Soc. Japan.*, 96 (5), 345–352,  
260 doi:10.5575/geosoc.96.345, 1990.

261 Wallis, S. R.: Vorticity analysis in a metachert from the Sanbagawa Belt, SW Japan,  
262 *J. Struct. Geol.*, 14 (3), 271–280, doi:10.1016/0191-8141(92)90085-B, 1992.

263 Wallis, S. R., Anczkiewicz, R., Endo, S., Aoya, M., Platt, J. P., Thirlwall, M., and Hirata,  
264 T.: Plate movements, ductile deformation and geochronology of the Sanbagawa

265 belt, SW Japan: Tectonic significance of 89-88 Ma Lu-Hf eclogite ages, J.  
266 Metamorph. Geol., 27 (2), 93-105, <https://doi.org/10.1111/j.1525->  
267 1314.2008.00806.x, 2009.
